# Supplementary material for: Possible Health Effects of Road Dust in Winter: Studies in Poland
Source: MDPI journal article supplement (doi:10.3390/app13137444), 2023-06-23
Supplement: s1 [file s1]

**Table S1.** Description of sampling sites.

| No | Geographical coordinates     | Location            | Description                                                                                                                                                                                                                                                                                                                                                                                | Traffic volume               |
|----|------------------------------|---------------------|--------------------------------------------------------------------------------------------------------------------------------------------------------------------------------------------------------------------------------------------------------------------------------------------------------------------------------------------------------------------------------------------|------------------------------|
|    |                              |                     |                                                                                                                                                                                                                                                                                                                                                                                            | quantity of vehicles<br>hour |
| 1  | 51°08'44.9"N<br>17°01'20.7"E | Wrocław             | The site is located at Obornicka Street about 6 km from the center of Wrocław, on the route leading to the exit from the city in the direction of Poznań. Buildings with municipal heating predominate.                                                                                                                                                                                    | 300                          |
| 2  | 51°06'33.9"N<br>17°03'07.6"E | Wrocław             | Grunwaldzki Square is located in the city center. There are compact residential buildings with municipal heating and individual heating. In the vicinity Wrocław University of Science and Technology and the Pasaż Grunwaldzki shopping centre are located.                                                                                                                               | 800                          |
| 3  | 51°02'55.5"N<br>16°57'01.6"E | Bielany Wrocławskie | Bielany Wrocławskie is a village located southwest of Wrocław. There is a high density of shopping centers and service facilities, as well as industrial areas. There is no compact residential development in the nearby area of the sampling point.                                                                                                                                      | 500                          |
| 4  | 50°20'31.4"N<br>18°56'51.4"E | Bytom               | The site is located outside the center of Bytom, on national road No. 94. There are mainly low-rise buildings with individual heating. In the vicinity there are several factories, single-family houses and allotment gardens.                                                                                                                                                            | 660                          |
| 5  | 50°20'44.4"N<br>18°58'02.5"E | Piekary Śląskie     | The site is located at Kotuchy street, nearly 1 km from national road No. 94, at a distance of about 1.5 km from center of the district of Brzeziny Śląskie in Piekary Śląskie. It is a post-industrial area with unused land and abandoned hotels. Many companies are located here: waste disposal plant, the company Orzeł Biały- the market leader of refined lead producers in Poland. | 520                          |
| 6  | 50°20'17.3"N<br>18°58'28.6"E | Piekary Śląskie     | The site is located near the national road No. 94, at Harcerska street, in a distance of approximately 1 km from the center of the district of Brzeziny Śląskie in Piekary Śląskie. The area is characterized by low, old, multi-family buildings with individual heating. The company Orzeł Biały is located few hundred meters in the north.                                             | 570                          |

**Table S2.** The volume for given parameters according to US EPA [19,21, 27].

| Parameter                   | Adults               | Children             |
|-----------------------------|----------------------|----------------------|
| ingR [m <sup>3</sup> / day] | 200                  | 100                  |
| EF [day / year]             | 180                  | 180                  |
| ED [year]                   | 70                   | 6                    |
| AT [day]                    | 70*365d              | 6*365d               |
| BW [kg]                     | 70                   | 15                   |
| inhR [m <sup>3</sup> / day] | 20                   | 7,6                  |
| PEF [m <sup>3</sup> / kg]   | 1,39*10 <sup>9</sup> | 1,39*10 <sup>9</sup> |
| ABS                         | 0,001                | 0,001                |

|                                 |      |      |
|---------------------------------|------|------|
| SL [mg / cm <sup>2</sup> · day] | 0,7  | 0,2  |
| SA [cm <sup>2</sup> ]           | 5700 | 2800 |
| ET [h/day]                      | 14   | 8    |

Table S3. The values of the reference doses (RfD).

| ng/kg*d   | RfDing               | RfDinh               | RfDderm              |
|-----------|----------------------|----------------------|----------------------|
| <b>Cu</b> | 4·10 <sup>4</sup>    | 4·10 <sup>4</sup>    | 4·10 <sup>4</sup>    |
| <b>Mn</b> | 1.4·10 <sup>5</sup>  | 4·10 <sup>3</sup>    | 1.4·10 <sup>5</sup>  |
| <b>Mg</b> | 1.4·10 <sup>5</sup>  | -                    | 1.4·10 <sup>5</sup>  |
| <b>Al</b> | -                    | -                    | -                    |
| <b>Ni</b> | 2·10 <sup>4</sup>    | 5.4·10 <sup>2</sup>  | 2·10 <sup>4</sup>    |
| <b>As</b> | -                    | 3·10 <sup>2</sup>    | 3·10 <sup>2</sup>    |
| <b>Zn</b> | 3·10 <sup>5</sup>    | 6·10 <sup>4</sup>    | 3·10 <sup>5</sup>    |
| <b>Pb</b> | 3.52·10 <sup>3</sup> | 5.25·10 <sup>2</sup> | 3.5·10 <sup>3</sup>  |
| <b>V</b>  | 7·10 <sup>3</sup>    | 7·10 <sup>1</sup>    | 5.04·10 <sup>3</sup> |
| <b>Cr</b> | 2.68·10 <sup>1</sup> | 6·10 <sup>1</sup>    | 3·10 <sup>3</sup>    |
| <b>Co</b> | 5.71·10 <sup>0</sup> | 1.6·10 <sup>4</sup>  | 3·10 <sup>2</sup>    |
| <b>Cd</b> | 1·10 <sup>3</sup>    | 1·10 <sup>1</sup>    | 1·10 <sup>3</sup>    |

Table S4. Geochemical background values [mg/kg] based on Wedepohl [29].

| Geochemical background |       | Geochemical background |       |
|------------------------|-------|------------------------|-------|
| <b>Cd</b>              | 0.102 | <b>Ni</b>              | 18.6  |
| <b>Co</b>              | 11.6  | <b>Pb</b>              | 17    |
| <b>Cr</b>              | 35    | <b>Zn</b>              | 83    |
| <b>Cu</b>              | 14.3  | <b>V</b>               | 53    |
| <b>Mn</b>              | 527   | <b>As</b>              | 2     |
| <b>Mg</b>              | 13510 | <b>Al</b>              | 77440 |

Table S5. Classes for PI [28].

| PI value   | Level of pollution |
|------------|--------------------|
| PI ≤ 1     | none               |
| 1 < PI ≤ 2 | small              |
| 2 < PI ≤ 3 | moderate           |
| PI > 3     | high               |

Table S6. Classes for PLI [29].

| Class | PLI value | Level of pollution |
|-------|-----------|--------------------|
| 1     | <0        | none               |
| 2     | 0-1       | small              |
| 3     | 1-2       | moderate           |
| 4     | 2-4       | high               |
| 5     | 4-8       | very high          |
| 6     | 8-16      | extremely high     |

Table S7. Enrichment factor classes according to Yongming (2006) [34].

| Class of EF | Characteristic               |
|-------------|------------------------------|
| <1          | -                            |
| <3          | poor enrichment              |
| 3-5         | moderate enrichment          |
| 5-10        | moderately strong enrichment |

|       |                           |
|-------|---------------------------|
| 10-25 | high enrichment           |
| 25-50 | very high enrichment      |
| >50   | extremely high enrichment |

**Table S8.** Classes of geoaccumulation index  $I_{geo}$  according to Müller (1979) [36].

| $I_{geo}$ | $I_{geo}$ Class | Characteristic                      |
|-----------|-----------------|-------------------------------------|
| <0        | 0               | not polluted                        |
| 0-1       | 1               | not polluted to moderately polluted |
| 1-2       | 2               | moderately polluted                 |
| 2-3       | 3               | moderately to strongly polluted     |
| 3-4       | 4               | strongly polluted                   |
| 4-5       | 5               | strongly to extremely polluted      |
| >5        | 6               | extremely polluted                  |

**Table S9.** The average total content of metals  $\pm$  SD and variation coefficient (CV) in URD for Upper and Lower Silesia agglomeration (mg/kg).

| site                    | Mn                          | Ni                        | Cu                        | Zn                            | As                        | Cr                             | Mg                            | Al                                    | Co                       | Pb                          | Cd                       | V                       |
|-------------------------|-----------------------------|---------------------------|---------------------------|-------------------------------|---------------------------|--------------------------------|-------------------------------|---------------------------------------|--------------------------|-----------------------------|--------------------------|-------------------------|
| 1                       | 300.4<br>0 $\pm$ 62.<br>5a  | 107.8<br>0 $\pm$ 12.<br>4 | 38.90<br>$\pm$ 3.7a       | 180.05<br>$\pm$ 24.8          | 3.90 $\pm$<br>0.4         | 163.0<br>7 $\pm$ 18.<br>2<br>a | 6410.0<br>3 $\pm$ 459.<br>3   | 1035.90 $\pm$<br>128.5                | 11.80<br>$\pm$ 1.5a<br>b | 16.30<br>$\pm$ 1.8ab        | 0.10 $\pm$<br>0.1        | 21.7<br>0 $\pm$ 2.<br>6 |
| 2                       | 230.9<br>0 $\pm$ 18.<br>9   | 17.5 $\pm$<br>1.8c        | 41.10<br>$\pm$ 4.5        | 451.30<br>40.5a<br>b          | 3.30 $\pm$<br>0.3         | 34.70<br>$\pm$ 4.6a<br>b       | 5830.4<br>0 $\pm$ 523.<br>1   | 6394.30 $\pm$<br>678.3                | 4.20 $\pm$<br>0.4a       | 36.90<br>$\pm$ 3.5          | 0.20 $\pm$<br>0.02a      | 19.1<br>0 $\pm$ 2.<br>1 |
| 3                       | 248.2<br>0 $\pm$ 23.<br>6a  | 45.90<br>$\pm$ 52.7       | 71.80<br>$\pm$ 7.8        | 242.50<br>$\pm$ 22.2a         | 8.30 $\pm$<br>0.8         | 126.1<br>0 $\pm$ 12.<br>8      | 6290.2<br>0 $\pm$ 555.<br>3   | 10508.90<br>$\pm$ 1543.7              | 5.70 $\pm$<br>0.5        | 34.60<br>$\pm$ 4.3          | 0.60 $\pm$<br>0.06       | 16.1<br>0 $\pm$ 1.<br>8 |
| 4                       | 70.10<br>$\pm$ 8.1          | 3.10 $\pm$<br>0.3         | 6.09 $\pm$<br>0.5         | 6340.5<br>0 $\pm$ 666.<br>9   | -                         | 8.50 $\pm$<br>0.8              | 32500.<br>70 $\pm$ 316<br>5.3 | 14000.50<br>$\pm$ 1543.7              | 1.40 $\pm$<br>0.1        | 4.70 $\pm$<br>0.5           | 0.05 $\pm$<br>0.001      | 6.30<br>$\pm$ 0.6       |
| 5                       | 1024.<br>07 $\pm$ 12<br>8.5 | 39.20<br>$\pm$ 2.2        | 47.60<br>$\pm$ 4.5        | 11240.<br>10 $\pm$ 111<br>0.3 | 2.60 $\pm$<br>0.2ab       | 390.6<br>0 $\pm$ 32.<br>1      | 83600.<br>10 $\pm$ 850<br>0.9 | 245230.1<br>0 $\pm$ 2224.3            | 4.50 $\pm$<br>0.4a       | 31.90<br>$\pm$ 3.6          | 0.20 $\pm$<br>0.002<br>a | 22.6<br>0 $\pm$ 2.<br>5 |
| 6                       | 772.0<br>1 $\pm$ 78.<br>6   | 29.60<br>$\pm$ 3.2        | 156.5<br>0 $\pm$ 16.<br>8 | 5780.2<br>0 $\pm$ 555.<br>3   | 815.8<br>0 $\pm$ 84.<br>9 | 66.60<br>$\pm$ 7.7             | 45140.<br>01 $\pm$ 432<br>0.5 | 16540.20<br>$\pm$ 14 $\pm$ 154<br>2.1 | 6.80 $\pm$<br>0.6        | 1720.<br>70 $\pm$ 16<br>4.5 | 12.80<br>$\pm$ 2.3       | 28.6<br>0 $\pm$ 2.<br>9 |
| Lower Silesia (average) | 259.8<br>3 $\pm$ 21.<br>8   | 57.07<br>$\pm$ 5.6        | 50.6 $\pm$<br>0.5.1       | 291.28<br>$\pm$ 28.7          | 5.17 $\pm$<br>0.5         | 107.9<br>6 $\pm$ 11.<br>9      | 6176.8<br>8 $\pm$ 643.<br>6   | 5979.70 $\pm$<br>342.3                | 7.23 $\pm$<br>0.7        | 29.27<br>$\pm$ 2.4          | 0.30 $\pm$<br>0.003      | 18.9<br>7 $\pm$ 1.<br>9 |
| Upper Silesia (average) | 622.0<br>6 $\pm$ 58.<br>7   | 23.97<br>$\pm$ 2.8        | 70.33<br>$\pm$ 6.1        | 7786.9<br>3 $\pm$ 668.<br>9   | 409.2<br>0 $\pm$ 42.<br>5 | 155.2<br>3 $\pm$ 14.<br>8      | 53746.<br>94 $\pm$ 520<br>0.3 | 91923.60<br>$\pm$ 10228.1             | 4.23 $\pm$<br>0.4        | 585.7<br>7 $\pm$ 61.<br>6   | 4.35 $\pm$<br>0.4        | 19.1<br>7 $\pm$ 1.<br>8 |
| CV Lower Silesia        | 79.47                       | 78.02                     | 109.9<br>7                | 38.57                         | 114.9<br>2                | 132.6<br>3                     | 49.52                         | 144.44                                | 64.01                    | 167.8<br>1                  | 168.2<br>4               | 60.2<br>1               |
| CV Upper Silesia        | 13.92                       | 80.91                     | 36.35                     | 48.77                         | 52.84                     | 61.21                          | 4.95                          | 79.44                                 | 55.65                    | 38.57                       | 88.19                    | 14.7<br>8               |

Legend: CV(%) coefficient of variations. Content followed by the same letters do not differ significantly (p values < 0.05).

Table S10. ADD values for every element at each sampling point for adults and children [ng/kg-d]

| Mn          |                           |                           |                           |                           |                           |                           |               |               |               |               |               |               |
|-------------|---------------------------|---------------------------|---------------------------|---------------------------|---------------------------|---------------------------|---------------|---------------|---------------|---------------|---------------|---------------|
|             | 1                         | 2                         | 3                         | 4                         | 5                         | 6                         | 1             | 2             | 3             | 4             | 5             | 6             |
| Adult       |                           |                           |                           |                           |                           |                           | Children      |               |               |               |               |               |
| ADD<br>ing  | 4,23*<br>10 <sup>2</sup>  | 3,24*<br>10 <sup>2</sup>  | 3,50*<br>10 <sup>2</sup>  | 9,92*<br>10 <sup>1</sup>  | 1,44*<br>10 <sup>3</sup>  | 1,09*1<br>0 <sup>3</sup>  | 9,88*1<br>0 2 | 7,56*1<br>0 2 | 8,16*<br>10 2 | 2,31*<br>10 2 | 3,37*<br>10 3 | 2,54*<br>10 3 |
| ADD<br>inh  | 3,05*<br>10 <sup>-2</sup> | 2,33*<br>10 <sup>-2</sup> | 2,52*<br>10 <sup>-2</sup> | 7,14*<br>10 <sup>-3</sup> | 1,04*<br>10 <sup>-1</sup> | 7,82*1<br>0 <sup>-2</sup> | 5,40*1<br>0-2 | 4,13*1<br>0-2 | 4,46*<br>10-2 | 1,27*<br>10-2 | 1,84*<br>10-1 | 1,39*<br>10-1 |
| ADD<br>derm | 8,44*<br>10 <sup>0</sup>  | 6,47*<br>10 <sup>0</sup>  | 6,98*<br>10 <sup>0</sup>  | 1,98*<br>10 <sup>0</sup>  | 2,88*<br>10 <sup>1</sup>  | 2,17*1<br>0 <sup>1</sup>  | 5,53*1<br>0 0 | 4,23*1<br>0 0 | 4,57*<br>10 0 | 1,30*<br>10 0 | 1,88*<br>10 1 | 1,42*<br>10 1 |
| Ni          |                           |                           |                           |                           |                           |                           |               |               |               |               |               |               |
|             | 1                         | 2                         | 3                         | 4                         | 5                         | 6                         | 1             | 2             | 3             | 4             | 5             | 6             |
| Adult       |                           |                           |                           |                           |                           |                           | Children      |               |               |               |               |               |
| ADD<br>ing  | 1,51*<br>10 2             | 2,46*<br>10 1             | 6,41*<br>10 1             | 4,78*<br>10 0             | 5,51*<br>10 1             | 4,05*1<br>0 1             | 3,53*1<br>0 2 | 5,74*1<br>0 1 | 1,50*<br>10 2 | 1,11*<br>10 1 | 1,29*<br>10 2 | 9,46*<br>10 1 |
| ADD<br>inh  | 1,09*<br>10-2             | 1,77*<br>10-3             | 4,61*<br>10-3             | 3,44*<br>10-4             | 3,96*<br>10-3             | 2,92*1<br>0-3             | 1,93*1<br>0-2 | 3,14*1<br>0-3 | 8,18*<br>10-3 | 6,09*<br>10-4 | 7,03*<br>10-3 | 5,17*<br>10-3 |
| ADD<br>derm | 3,01*<br>10 0             | 4,91*<br>10-1             | 1,28*<br>10 0             | 9,53*<br>10-2             | 1,10*<br>10 0             | 8,08*1<br>0-1             | 1,97*1<br>0 0 | 3,21*1<br>0-1 | 8,38*<br>10-1 | 6,24*<br>10-2 | 7,20*<br>10-1 | 5,29*<br>10-1 |
| Cu          |                           |                           |                           |                           |                           |                           |               |               |               |               |               |               |
|             | 1                         | 2                         | 3                         | 4                         | 5                         | 6                         | 1             | 2             | 3             | 4             | 5             | 6             |
| Adult       |                           |                           |                           |                           |                           |                           | Children      |               |               |               |               |               |
| ADD<br>ing  | 5,42*<br>10 1             | 5,74*<br>10 1             | 1,00*<br>10 2             | 9,13*<br>10 0             | 6,64*<br>10 1             | 2,20*1<br>0 2             | 1,26*1<br>0 2 | 1,34*1<br>0 2 | 2,34*<br>10 2 | 2,13*<br>10 1 | 1,55*<br>10 2 | 5,13*<br>10 2 |
| ADD<br>inh  | 3,90*<br>10-3             | 4,13*<br>10-3             | 7,22*<br>10-3             | 6,57*<br>10-4             | 4,78*<br>10-3             | 1,58*1<br>0-2             | 6,91*1<br>0-3 | 7,32*1<br>0-3 | 1,28*<br>10-2 | 1,16*<br>10-3 | 8,48*<br>10-3 | 2,81*<br>10-2 |
| ADD<br>derm | 1,08*<br>10 0             | 1,14*<br>10 0             | 2,00*<br>10 0             | 1,82*<br>10-1             | 1,33*<br>10 0             | 4,39*1<br>0 0             | 7,08*1<br>0-1 | 7,50*1<br>0-1 | 1,31*<br>10 0 | 1,19*<br>10-1 | 8,68*<br>10-1 | 2,87*<br>10 0 |
| Zn          |                           |                           |                           |                           |                           |                           |               |               |               |               |               |               |
|             | 1                         | 2                         | 3                         | 4                         | 5                         | 6                         | 1             | 2             | 3             | 4             | 5             | 6             |
| Adult       |                           |                           |                           |                           |                           |                           | Children      |               |               |               |               |               |
| ADD<br>ing  | 3,35*<br>10 2             | 6,35*<br>10 2             | 3,41*<br>10 2             | 8,93*<br>10 3             | 1,58*<br>10 4             | 8,14*1<br>0 3             | 5,92*1<br>0 2 | 1,48*1<br>0 3 | 7,96*<br>10 2 | 2,08*<br>10 4 | 3,70*<br>10 4 | 1,90*<br>10 4 |
| ADD<br>inh  | 2,41*<br>10-2             | 4,57*<br>10-2             | 2,45*<br>10-2             | 6,43*<br>10-1             | 1,14*<br>10 0             | 5,86*1<br>0-1             | 3,24*1<br>0-2 | 8,11*1<br>0-2 | 4,35*<br>10-2 | 1,14*<br>10 0 | 2,02*<br>10 0 | 1,04*<br>10 0 |
| ADD<br>derm | 6,69*<br>10 0             | 1,27*<br>10 1             | 6,80*<br>10 0             | 1,78*<br>10 2             | 3,16*<br>10 2             | 1,62*1<br>0 2             | 3,31*1<br>0 0 | 8,30*1<br>0 0 | 4,46*<br>10 0 | 1,17*<br>10 2 | 2,07*<br>10 2 | 1,06*<br>10 2 |
| As          |                           |                           |                           |                           |                           |                           |               |               |               |               |               |               |
|             | 1                         | 2                         | 3                         | 4                         | 5                         | 6                         | 1             | 2             | 3             | 4             | 5             | 6             |
| Adult       |                           |                           |                           |                           |                           |                           | Children      |               |               |               |               |               |
| ADD<br>ing  | 3,55*<br>10 0             | 4,17*<br>10 0             | 1,06*<br>10 1             | 6,76*<br>10-1             | 2,85*<br>10 0             | 1,15*1<br>0 3             | 8,28*1<br>0 0 | 9,73*1<br>0 0 | 2,48*<br>10 1 | 1,58*<br>10 0 | 6,64*<br>10 0 | 2,68*<br>10 3 |
| ADD<br>inh  | 2,55*<br>10-4             | 3,00*<br>10-4             | 7,64*<br>10-4             | 4,87*<br>10-5             | 2,05*<br>10-4             | 8,26*1<br>0-2             | 4,53*1<br>0-4 | 5,32*1<br>0-4 | 1,36*<br>10-3 | 8,63*<br>10-5 | 3,63*<br>10-4 | 1,47*<br>10-1 |
| ADD<br>derm | 7,08*<br>10-2             | 8,32*<br>10-2             | 2,12*<br>10-1             | 1,35*<br>10-2             | 5,68*<br>10-2             | 2,29*1<br>0 1             | 4,64*1<br>0-2 | 5,45*1<br>0-2 | 1,39*<br>10-1 | 8,84*<br>10-3 | 3,72*<br>10-2 | 1,50*<br>10 1 |
| Cr          |                           |                           |                           |                           |                           |                           |               |               |               |               |               |               |
|             | 1                         | 2                         | 3                         | 4                         | 5                         | 6                         | 1             | 2             | 3             | 4             | 5             | 6             |
| Adult       |                           |                           |                           |                           |                           |                           |               | Children      |               |               |               |               |
| ADD<br>ing  | 2,29*<br>10 2             | 4,74*<br>10 1             | 1,78*<br>10 2             | 1,07*<br>10 1             | 5,50*<br>10 2             | 9,29*1<br>0 1             | 5,34*1<br>0 2 | 1,11*1<br>0 2 | 4,15*<br>10 2 | 2,49*<br>10 1 | 1,28*<br>10 3 | 2,17*<br>10 2 |

|              |          |          |          |          |          |          |                 |          |          |          |          |          |
|--------------|----------|----------|----------|----------|----------|----------|-----------------|----------|----------|----------|----------|----------|
| <b>ADD</b>   | 1,65*    | 3,41*    | 1,28*    | 7,66*    | 3,95*    | 6,68*1   | 2,92*1          | 6,05*1   | 2,27*    | 1,36*    | 7,01*    | 1,18*    |
| <b>inh</b>   | 10-2     | 10-3     | 10-2     | 10-4     | 10-2     | 0-3      | 0-2             | 0-3      | 10-2     | 10-3     | 10-2     | 10-2     |
| <b>ADD</b>   | 4,57*    | 9,46*    | 3,55*    | 2,13*    | 1,10*    | 1,85*1   | 2,99*1          | 6,20*1   | 2,32*    | 1,39*    | 7,18*    | 1,21*    |
| <b>derm</b>  | 10 0     | 10-1     | 10 0     | 10-1     | 10 1     | 0 0      | 0 0             | 0-1      | 10 0     | 10-1     | 10 0     | 10 0     |
| <b>Co</b>    |          |          |          |          |          |          |                 |          |          |          |          |          |
|              | <b>1</b> | <b>2</b> | <b>3</b> | <b>4</b> | <b>5</b> | <b>6</b> | <b>1</b>        | <b>2</b> | <b>3</b> | <b>4</b> | <b>5</b> | <b>6</b> |
| <b>Adult</b> |          |          |          |          |          |          | <b>Children</b> |          |          |          |          |          |
| <b>ADD</b>   | 1,67*    | 5,90*    | 8,02*    | 2,04*    | 6,41*    | 9,60*1   | 3,91*1          | 1,38*1   | 1,87*    | 4,77*    | 1,50*    | 2,24*    |
| <b>ing</b>   | 10 1     | 10 0     | 10 0     | 10 0     | 10 0     | 0 0      | 0 1             | 0 1      | 10 1     | 10 0     | 10 1     | 10 1     |
| <b>ADD</b>   | 1,20*    | 4,25*    | 5,77*    | 1,47*    | 4,61*    | 6,90*1   | 2,14*1          | 7,53*1   | 1,02*    | 2,61*    | 8,18*    | 1,22*    |
| <b>inh</b>   | 10-3     | 10-4     | 10-4     | 10-4     | 10-4     | 0-4      | 0-3             | 0-4      | 10-3     | 10-4     | 10-4     | 10-3     |
| <b>ADD</b>   | 3,34*    | 1,18*    | 1,60*    | 4,08*    | 1,28*    | 1,91*1   | 2,19*1          | 7,71*1   | 1,05*    | 2,67*    | 8,38*    | 1,25*    |
| <b>derm</b>  | 10-1     | 10-1     | 10-1     | 10-2     | 10-1     | 0-1      | 0-1             | 0-2      | 10-1     | 10-2     | 10-2     | 10-1     |
| <b>Pb</b>    |          |          |          |          |          |          |                 |          |          |          |          |          |
|              | <b>1</b> | <b>2</b> | <b>3</b> | <b>4</b> | <b>5</b> | <b>6</b> | <b>1</b>        | <b>2</b> | <b>3</b> | <b>4</b> | <b>5</b> | <b>6</b> |
| <b>Adult</b> |          |          |          |          |          |          | <b>Children</b> |          |          |          |          |          |
| <b>ADD</b>   | 2,30*    | 5,21*    | 4,87*    | 6,69*    | 4,50*    | 2,42*1   | 5,36*1          | 1,22*1   | 1,14*    | 1,56*    | 1,05*    | 5,66*    |
| <b>ing</b>   | 10 1     | 10 1     | 10 1     | 10 0     | 10 1     | 0 3      | 0 1             | 0 2      | 10 2     | 10 1     | 10 2     | 10 3     |
| <b>ADD</b>   | 1,65*    | 3,75*    | 3,51*    | 4,81*    | 3,24*    | 1,74*1   | 2,93*1          | 6,65*1   | 6,22*    | 8,54*    | 5,74*    | 3,09*    |
| <b>inh</b>   | 10-3     | 10-3     | 10-3     | 10-4     | 10-3     | 0-1      | 0-3             | 0-3      | 10-3     | 10-4     | 10-3     | 10-1     |
| <b>ADD</b>   | 4,58*    | 1,04*    | 9,72*    | 1,34*    | 8,98*    | 4,84*1   | 3,00*1          | 6,81*1   | 6,37*    | 8,75*    | 5,88*    | 3,17*    |
| <b>derm</b>  | 10-1     | 10 0     | 10-1     | 10-1     | 10-1     | 0 1      | 0-1             | 0-1      | 10-1     | 10-2     | 10-1     | 10 1     |
| <b>Cd</b>    |          |          |          |          |          |          |                 |          |          |          |          |          |
|              | <b>1</b> | <b>2</b> | <b>3</b> | <b>4</b> | <b>5</b> | <b>6</b> | <b>1</b>        | <b>2</b> | <b>3</b> | <b>4</b> | <b>5</b> | <b>6</b> |
| <b>Adult</b> |          |          |          |          |          |          | <b>Children</b> |          |          |          |          |          |
| <b>ADD</b>   | 1,55*    | 3,38*    | 9,02*    | 7,05*    | 2,54*    | 1,81*1   | 3,62*1          | 7,89*1   | 2,10*    | 1,64*    | 5,92*    | 4,23*    |
| <b>ing</b>   | 10-1     | 10-1     | 10-1     | 10-2     | 10-1     | 0 1      | 0-1             | 0-1      | 10 0     | 10-1     | 10-1     | 10 1     |
| <b>ADD</b>   | 1,12*    | 2,43*    | 6,49*    | 5,07*    | 1,82*    | 1,30*1   | 1,98*1          | 4,31*1   | 1,15*    | 8,99*    | 3,24*    | 2,31*    |
| <b>inh</b>   | 10-5     | 10-5     | 10-5     | 10-6     | 10-5     | 0-3      | 0-5             | 0-5      | 10-4     | 10-6     | 10-5     | 10-3     |
| <b>ADD</b>   | 3,09*    | 6,75*    | 1,80*    | 1,41*    | 5,06*    | 3,61*1   | 2,03*1          | 4,42*1   | 1,18*    | 9,21*    | 3,31*    | 2,37*    |
| <b>derm</b>  | 10-3     | 10-3     | 10-2     | 10-3     | 10-3     | 0-1      | 0-3             | 0-3      | 10-2     | 10-4     | 10-3     | 10-1     |
| <b>V</b>     |          |          |          |          |          |          |                 |          |          |          |          |          |
|              | <b>1</b> | <b>2</b> | <b>3</b> | <b>4</b> | <b>5</b> | <b>6</b> | <b>1</b>        | <b>2</b> | <b>3</b> | <b>4</b> | <b>5</b> | <b>6</b> |
| <b>Adult</b> |          |          |          |          |          |          | <b>Children</b> |          |          |          |          |          |
| <b>ADD</b>   | 3,07*    | 2,69*    | 2,28*    | 8,89*    | 3,19*    | 4,04*1   | 7,15*1          | 6,28*1   | 5,31*    | 2,07*    | 7,45*    | 9,43*    |
| <b>ing</b>   | 10 1     | 10 1     | 10 1     | 10 0     | 10 1     | 0 1      | 0 1             | 0 1      | 10 1     | 10 1     | 10 1     | 10 1     |
| <b>ADD</b>   | 2,21*    | 1,94*    | 1,64*    | 6,40*    | 2,30*    | 2,91*1   | 3,91*1          | 3,43*1   | 2,90*    | 1,13*    | 4,07*    | 5,16*    |
| <b>inh</b>   | 10-3     | 10-3     | 10-3     | 10-4     | 10-3     | 0-3      | 0-3             | 0-3      | 10-3     | 10-3     | 10-3     | 10-3     |
| <b>ADD</b>   | 6,12*    | 5,37*    | 4,54*    | 1,77*    | 6,37*    | 8,06*1   | 4,01*1          | 3,52*1   | 2,98*    | 1,16*    | 4,17*    | 5,28*    |
| <b>derm</b>  | 10-1     | 10-1     | 10-1     | 10-1     | 10-1     | 0-1      | 0-1             | 0-1      | 10-1     | 10-1     | 10-1     | 10-1     |

Table S11. HQ and HI values for every element at each sampling point for adults and children

|              |          |          |          |          |          |           |                 |           |           |           |           |           |
|--------------|----------|----------|----------|----------|----------|-----------|-----------------|-----------|-----------|-----------|-----------|-----------|
| <b>Mn</b>    |          |          |          |          |          |           |                 |           |           |           |           |           |
|              | <b>1</b> | <b>2</b> | <b>3</b> | <b>4</b> | <b>5</b> | <b>6</b>  | <b>1</b>        | <b>2</b>  | <b>3</b>  | <b>4</b>  | <b>5</b>  | <b>6</b>  |
| <b>Adult</b> |          |          |          |          |          |           | <b>Children</b> |           |           |           |           |           |
| HQ           | 3,02*    | 2,31*    | 2,50*    | 7,09*    | 1,03*    | 7,77*10-3 | 7,05*10-3       | 5,40*10-3 | 5,83*10-3 | 1,65*10-3 | 2,40*10-2 | 1,81*10-2 |
| ing          | 10-3     | 10-3     | 10-3     | 10-4     | 10-2     |           |                 |           |           |           |           |           |
| HQ           | 2,18*    | 1,67*    | 1,80*    | 5,10*    | 7,41*    | 5,59*10-7 | 3,86*10-7       | 2,95*10-7 | 3,19*10-7 | 9,04*10-8 | 1,31*10-6 | 9,91*10-7 |
| inh          | 10-7     | 10-7     | 10-7     | 10-8     | 10-7     |           |                 |           |           |           |           |           |

|            |               |               |               |               |               |           |                   |               |               |               |               |               |
|------------|---------------|---------------|---------------|---------------|---------------|-----------|-------------------|---------------|---------------|---------------|---------------|---------------|
| HQd<br>erm | 2,11*<br>10-3 | 1,62*<br>10-3 | 1,74*<br>10-3 | 4,95*<br>10-4 | 7,19*<br>10-3 | 5,42*10-3 | 1,38<br>*10-<br>3 | 1,06*<br>10-3 | 1,14*<br>10-3 | 3,24*<br>10-4 | 4,71*<br>10-3 | 3,55*<br>10-3 |
| HI         | 5,13*<br>10-3 | 3,93*<br>10-3 | 4,24*<br>10-3 | 1,20*<br>10-3 | 1,75*<br>10-2 | 1,32*10-2 | 8,44<br>*10-<br>3 | 6,46*<br>10-3 | 6,97*<br>10-3 | 1,98*<br>10-3 | 2,88*<br>10-2 | 2,17*<br>10-2 |
| Ni         |               |               |               |               |               |           |                   |               |               |               |               |               |
|            | 1             | 2             | 3             | 4             | 5             | 6         | 1                 | 2             | 3             | 4             | 5             | 6             |
| Adult      |               |               |               |               |               | Children  |                   |               |               |               |               |               |
| HQ<br>ing  | 7,56*<br>10-3 | 1,23*<br>10-3 | 3,20*<br>10-3 | 2,39*<br>10-4 | 2,75*<br>10-3 | 2,03*10-3 | 1,76<br>*10-<br>2 | 2,87*<br>10-3 | 7,48*<br>10-3 | 5,57*<br>10-4 | 6,43*<br>10-3 | 4,73*<br>10-3 |
| HQ<br>inh  | 5,44*<br>10-7 | 8,85*<br>10-8 | 2,31*<br>10-7 | 1,72*<br>10-8 | 1,98*<br>10-7 | 1,46*10-7 | 9,64<br>*10-<br>7 | 1,57*<br>10-7 | 4,09*<br>10-7 | 3,05*<br>10-8 | 3,51*<br>10-7 | 2,58*<br>10-7 |
| HQd<br>erm | 5,58*<br>10-3 | 9,09*<br>10-4 | 2,37*<br>10-3 | 1,76*<br>10-4 | 2,04*<br>10-3 | 1,50*10-3 | 3,66<br>*10-<br>3 | 5,95*<br>10-4 | 1,55*<br>10-3 | 1,16*<br>10-4 | 1,33*<br>10-3 | 9,81*<br>10-4 |
| HI         | 1,31*<br>10-2 | 2,14*<br>10-3 | 5,57*<br>10-3 | 4,15*<br>10-4 | 4,79*<br>10-3 | 3,52*10-3 | 2,13<br>*10-<br>2 | 3,47*<br>10-3 | 9,03*<br>10-3 | 6,73*<br>10-4 | 7,76*<br>10-3 | 5,71*<br>10-3 |
| Cu         |               |               |               |               |               |           |                   |               |               |               |               |               |
|            | 1             | 2             | 3             | 4             | 5             | 6         | 1                 | 2             | 3             | 4             | 5             | 6             |
| Adult      |               |               |               |               |               | Children  |                   |               |               |               |               |               |
| HQ<br>ing  | 1,35*<br>10-3 | 1,43*<br>10-3 | 2,51*<br>10-3 | 2,28*<br>10-4 | 1,66*<br>10-3 | 5,50*10-3 | 3,16<br>*10-<br>3 | 3,35*<br>10-3 | 5,85*<br>10-3 | 5,33*<br>10-4 | 3,88*<br>10-3 | 1,28*<br>10-2 |
| HQ<br>inh  | 9,74*<br>10-8 | 1,03*<br>10-7 | 1,80*<br>10-7 | 1,64*<br>10-8 | 1,20*<br>10-7 | 3,96*10-7 | 1,73<br>*10-<br>7 | 1,83*<br>10-7 | 3,20*<br>10-7 | 2,91*<br>10-8 | 2,12*<br>10-7 | 7,01*<br>10-7 |
| HQd<br>erm | 9,01*<br>10-5 | 9,54*<br>10-5 | 1,67*<br>10-4 | 1,52*<br>10-5 | 1,10*<br>10-4 | 3,66*10-4 | 5,90<br>*10-<br>5 | 6,25*<br>10-5 | 1,09*<br>10-4 | 9,94*<br>10-6 | 7,24*<br>10-5 | 2,39*<br>10-4 |
| HI         | 1,44*<br>10-3 | 1,53*<br>10-3 | 2,67*<br>10-3 | 2,43*<br>10-4 | 1,77*<br>10-3 | 5,86*10-3 | 3,22<br>*10-<br>3 | 3,41*<br>10-3 | 5,96*<br>10-3 | 5,43*<br>10-4 | 3,95*<br>10-3 | 1,31*<br>10-2 |
| Zn         |               |               |               |               |               |           |                   |               |               |               |               |               |
|            | 1             | 2             | 3             | 4             | 5             | 6         | 1                 | 2             | 3             | 4             | 5             | 6             |
| Adult      |               |               |               |               |               | Children  |                   |               |               |               |               |               |
| HQ<br>ing  | 8,45*<br>10-4 | 2,12*<br>10-3 | 1,14*<br>10-3 | 2,98*<br>10-2 | 5,28*<br>10-2 | 2,71*10-2 | 1,97<br>*10-<br>3 | 4,94*<br>10-3 | 2,65*<br>10-3 | 6,95*<br>10-2 | 1,23*<br>10-1 | 6,33*<br>10-2 |
| HQ<br>inh  | 6,08*<br>10-8 | 1,52*<br>10-7 | 8,18*<br>10-8 | 2,14*<br>10-6 | 3,80*<br>10-6 | 1,95*10-6 | 1,08<br>*10-<br>7 | 2,70*<br>10-7 | 1,45*<br>10-7 | 3,80*<br>10-6 | 6,73*<br>10-6 | 3,46*<br>10-6 |
| HQd<br>erm | 8,43*<br>10-5 | 2,11*<br>10-4 | 1,13*<br>10-4 | 2,97*<br>10-3 | 5,27*<br>10-3 | 2,71*10-3 | 5,52<br>*10-<br>5 | 1,38*<br>10-4 | 7,43*<br>10-5 | 1,95*<br>10-3 | 3,45*<br>10-3 | 1,77*<br>10-3 |
| HI         | 9,30*<br>10-4 | 2,33*<br>10-3 | 1,25*<br>10-3 | 3,27*<br>10-2 | 5,81*<br>10-2 | 2,99*10-2 | 2,03<br>*10-<br>3 | 5,08*<br>10-3 | 2,73*<br>10-3 | 7,14*<br>10-2 | 1,27*<br>10-1 | 6,51*<br>10-2 |
| As         |               |               |               |               |               |           |                   |               |               |               |               |               |
|            | 1             | 2             | 3             | 4             | 5             | 6         | 1                 | 2             | 3             | 4             | 5             | 6             |

| Adult   |               |               |               |               |               |           | Children       |               |               |               |               |               |  |
|---------|---------------|---------------|---------------|---------------|---------------|-----------|----------------|---------------|---------------|---------------|---------------|---------------|--|
| HQ ing  | 1,18*<br>10-2 | 1,39*<br>10-2 | 3,54*<br>10-2 | 2,25*<br>10-3 | 9,49*<br>10-3 | 3,83*10 0 | 5,92*<br>*10-5 | 6,95*<br>10-5 | 1,77*<br>10-4 | 5,26*<br>10-3 | 4,74*<br>10-5 | 1,91*<br>10-2 |  |
| HQ inh  | -             | -             | -             | -             | -             | -         | -              | -             | -             | -             | -             | -             |  |
| HQd erm | 2,36*<br>10-4 | 2,77*<br>10-4 | 7,06*<br>10-4 | 4,50*<br>10-5 | 1,89*<br>10-4 | 7,64*10-2 | 1,55*<br>*10-4 | 1,82*<br>10-4 | 4,63*<br>10-4 | 2,95*<br>10-5 | 1,24*<br>10-4 | 5,00*<br>10-2 |  |
| HI      | 1,21*<br>10-2 | 1,42*<br>10-2 | 3,61*<br>10-2 | 2,30*<br>10-3 | 9,68*<br>10-3 | 3,90*10 0 | 2,14*<br>*10-4 | 2,51*<br>10-4 | 6,40*<br>10-4 | 5,29*<br>10-3 | 1,71*<br>10-4 | 6,92*<br>10-2 |  |
| Cr      |               |               |               |               |               |           |                |               |               |               |               |               |  |
|         | 1             | 2             | 3             | 4             | 5             | 6         | 1              | 2             | 3             | 4             | 5             | 6             |  |
| Adult   |               |               |               |               |               |           | Children       |               |               |               |               |               |  |
| HQ ing  | 7,63*<br>10-2 | 1,58*<br>10-2 | 5,93*<br>10-2 | 3,55*<br>10-3 | 1,83*<br>10-1 | 3,10*10-2 | 1,78*<br>*10-1 | 3,69*<br>10-2 | 1,38*<br>10-1 | 8,28*<br>10-3 | 4,27*<br>10-1 | 7,22*<br>10-2 |  |
| HQ inh  | 5,76*<br>10-4 | 1,19*<br>10-4 | 4,48*<br>10-4 | 2,68*<br>10-5 | 1,38*<br>10-3 | 2,34*10-4 | 1,02*<br>*10-3 | 2,12*<br>10-4 | 7,94*<br>10-4 | 4,75*<br>10-5 | 2,45*<br>10-3 | 4,14*<br>10-4 |  |
| HQd erm | 7,61*<br>10-2 | 1,58*<br>10-2 | 5,92*<br>10-2 | 3,54*<br>10-3 | 1,83*<br>10-1 | 3,09*10-2 | 4,99*<br>*10-2 | 1,03*<br>10-2 | 3,87*<br>10-2 | 2,32*<br>10-3 | 1,20*<br>10-1 | 2,02*<br>10-2 |  |
| HI      | 1,53*<br>10-1 | 3,17*<br>10-2 | 1,19*<br>10-1 | 7,12*<br>10-3 | 3,67*<br>10-1 | 6,21*10-2 | 2,29*<br>*10-1 | 4,74*<br>10-2 | 1,78*<br>10-1 | 1,07*<br>10-2 | 5,50*<br>10-1 | 9,29*<br>10-2 |  |
| Co      |               |               |               |               |               |           |                |               |               |               |               |               |  |
|         | 1             | 2             | 3             | 4             | 5             | 6         | 1              | 2             | 3             | 4             | 5             | 6             |  |
| Adult   |               |               |               |               |               |           | Children       |               |               |               |               |               |  |
| HQ ing  | 5,58*<br>10-2 | 1,97*<br>10-2 | 2,67*<br>10-2 | 6,81*<br>10-3 | 2,14*<br>10-2 | 3,20*10-2 | 1,30*<br>*10-1 | 4,59*<br>10-2 | 6,24*<br>10-2 | 1,59*<br>10-2 | 4,99*<br>10-2 | 7,46*<br>10-2 |  |
| HQ inh  | 2,11*<br>10-4 | 7,44*<br>10-5 | 1,01*<br>10-4 | 2,57*<br>10-5 | 8,08*<br>10-5 | 1,21*10-4 | 3,74*<br>*10-4 | 1,32*<br>10-4 | 1,79*<br>10-4 | 4,56*<br>10-5 | 1,43*<br>10-4 | 2,14*<br>10-4 |  |
| HQd erm | 2,09*<br>10-5 | 7,36*<br>10-6 | 1,00*<br>10-5 | 2,55*<br>10-6 | 7,99*<br>10-6 | 1,20*10-5 | 1,37*<br>*10-5 | 4,82*<br>10-6 | 6,55*<br>10-6 | 1,67*<br>10-6 | 5,24*<br>10-6 | 7,84*<br>10-6 |  |
| HI      | 5,60*<br>10-2 | 1,98*<br>10-2 | 2,68*<br>10-2 | 6,84*<br>10-3 | 2,15*<br>10-2 | 3,21*10-2 | 1,31*<br>*10-1 | 4,61*<br>10-2 | 6,25*<br>10-2 | 1,59*<br>10-2 | 5,00*<br>10-2 | 7,49*<br>10-2 |  |
| Pb      |               |               |               |               |               |           |                |               |               |               |               |               |  |
|         | 1             | 2             | 3             | 4             | 5             | 6         | 1              | 2             | 3             | 4             | 5             | 6             |  |
| Adult   |               |               |               |               |               |           | Children       |               |               |               |               |               |  |
| HQ ing  | 6,56*<br>10-3 | 1,49*<br>10-2 | 1,39*<br>10-2 | 1,91*<br>10-3 | 1,29*<br>10-2 | 6,93*10-1 | 1,53*<br>*10-2 | 3,47*<br>10-2 | 6,37*<br>10-4 | 4,46*<br>10-3 | 3,00*<br>10-2 | 1,62*<br>10 0 |  |
| HQ inh  | 4,69*<br>10-7 | 1,06*<br>10-6 | 9,96*<br>10-7 | 1,37*<br>10-7 | 9,20*<br>10-7 | 4,96*10-5 | 8,32*<br>*10-7 | 1,89*<br>10-6 | 0,00*<br>10 0 | 2,43*<br>10-7 | 1,63*<br>10-6 | 8,79*<br>10-5 |  |
| HQd erm | 8,72*<br>10-4 | 1,98*<br>10-3 | 1,85*<br>10-3 | 2,54*<br>10-4 | 1,71*<br>10-3 | 9,21*10-2 | 5,71*<br>*10-4 | 1,30*<br>10-3 | 7,00*<br>10-1 | 1,67*<br>10-4 | 1,12*<br>10-3 | 6,03*<br>10-2 |  |

|              |               |               |               |               |               |                 |               |               |               |               |               |               |
|--------------|---------------|---------------|---------------|---------------|---------------|-----------------|---------------|---------------|---------------|---------------|---------------|---------------|
| HI           | 7,43*<br>10-3 | 1,69*<br>10-2 | 1,58*<br>10-2 | 2,17*<br>10-3 | 1,46*<br>10-2 | 7,85*10-1       | 1,59*<br>10-2 | 3,60*<br>10-2 | 7,01*<br>10-1 | 4,63*<br>10-3 | 3,11*<br>10-2 | 1,68*<br>10 0 |
| <b>Cd</b>    |               |               |               |               |               |                 |               |               |               |               |               |               |
|              | <b>1</b>      | <b>2</b>      | <b>3</b>      | <b>4</b>      | <b>5</b>      | <b>6</b>        | <b>1</b>      | <b>2</b>      | <b>3</b>      | <b>4</b>      | <b>5</b>      | <b>6</b>      |
| <b>Adult</b> |               |               |               |               |               | <b>Children</b> |               |               |               |               |               |               |
| HQing        | 1,55*<br>10-4 | 3,38*<br>10-4 | 9,02*<br>10-4 | 7,05*<br>10-5 | 2,54*<br>10-4 | 1,81*10-2       | 3,62*<br>10-4 | 7,89*<br>10-4 | 2,10*<br>10-3 | 1,64*<br>10-4 | 5,92*<br>10-4 | 4,23*<br>10-2 |
| HQinh        | 1,12*<br>10-8 | 2,43*<br>10-8 | 6,49*<br>10-8 | 5,07*<br>10-9 | 1,82*<br>10-8 | 1,30*10-6       | 1,98*<br>10-8 | 4,31*<br>10-8 | 1,15*<br>10-7 | 8,99*<br>10-9 | 3,24*<br>10-8 | 2,31*<br>10-6 |
| HQd<br>erm   | 3,09*<br>10-4 | 6,75*<br>10-4 | 1,80*<br>10-3 | 1,41*<br>10-4 | 5,06*<br>10-4 | 3,61*10-2       | 2,03*<br>10-4 | 4,42*<br>10-4 | 1,18*<br>10-3 | 9,21*<br>10-5 | 3,31*<br>10-4 | 2,37*<br>10-2 |
| HI           | 4,64*<br>10-4 | 1,01*<br>10-3 | 2,70*<br>10-3 | 2,11*<br>10-4 | 7,60*<br>10-4 | 5,43*10-2       | 5,64*<br>10-4 | 1,23*<br>10-3 | 3,28*<br>10-3 | 2,56*<br>10-4 | 9,23*<br>10-4 | 6,60*<br>10-2 |
| <b>V</b>     |               |               |               |               |               |                 |               |               |               |               |               |               |
|              | <b>1</b>      | <b>2</b>      | <b>3</b>      | <b>4</b>      | <b>5</b>      | <b>6</b>        | <b>1</b>      | <b>2</b>      | <b>3</b>      | <b>4</b>      | <b>5</b>      | <b>6</b>      |
| <b>Adult</b> |               |               |               |               |               | <b>Children</b> |               |               |               |               |               |               |
| HQing        | 6,08*<br>10-3 | 5,34*<br>10-3 | 4,52*<br>10-3 | 1,76*<br>10-3 | 6,33*<br>10-3 | 8,02*10-3       | 1,42*<br>10-2 | 1,25*<br>10-2 | 1,05*<br>10-2 | 4,12*<br>10-3 | 1,48*<br>10-2 | 1,87*<br>10-2 |
| HQinh        | 3,15*<br>10-7 | 2,77*<br>10-7 | 2,34*<br>10-7 | 9,14*<br>10-8 | 3,28*<br>10-7 | 4,15*10-7       | 3,11*<br>10-3 | 2,73*<br>10-3 | 2,31*<br>10-3 | 9,01*<br>10-4 | 3,24*<br>10-3 | 4,10*<br>10-3 |
| HQd<br>erm   | 8,74*<br>10-3 | 7,67*<br>10-3 | 6,49*<br>10-3 | 2,53*<br>10-3 | 9,10*<br>10-3 | 1,15*10-2       | 3,11*<br>10-1 | 2,73*<br>10-1 | 2,31*<br>10-1 | 9,01*<br>10-2 | 3,24*<br>10-1 | 4,10*<br>10-1 |
| HI           | 1,48*<br>10-2 | 1,30*<br>10-2 | 1,10*<br>10-2 | 4,30*<br>10-3 | 1,54*<br>10-2 | 1,95*10-2       | 3,28*<br>10-1 | 2,88*<br>10-1 | 2,44*<br>10-1 | 9,52*<br>10-2 | 3,42*<br>10-1 | 4,33*<br>10-1 |
